# Supplementary material for: EGFR endocytosis is a novel therapeutic target in lung cancer with wild-type EGFR
Source: PubMed Central journal article supplement (PMC4012721; doi:10.18632/oncotarget.1711), 2014-01-16
Supplement: oncotarget-05-1265-s002.pdf [file oncotarget-05-1265-s002.pdf]

Supplemental Table

Supplemental Table S1. List of genes differentially expressed between gefitinib-sensitive and -insensitive lung cancer cells with wtEGFR

| Expression | GeneSymbol | Fold change | H1703/H358.Lstat | H1703/H358.Ladjp |
|------------|------------|-------------|------------------|------------------|
| Down       | Rab17      | -23.60      | -23.95           | 3.12E-125        |
| Down       | Rab25      | -20.82      | -24.04           | 3.37E-126        |
| Down       | RIN2       | -9.08       | -16.36           | 9.50E-59         |
| Down       | SPRY1      | -5.70       | -12.94           | 0.00             |
| Down       | DNM3       | -5.58       | -12.83           | 2.35E-36         |
| Down       | MUC1       | -2.35       | -6.46            | 0.00             |
| Up         | SGK1       | 48.13       | 33.76            | 0.00             |
| Up         | ECH1       | 29.97       | 28.35            | 0.00             |
